# Supplementary material for: Has Gavi lived up to its promise? Quasi-experimental evidence on country immunisation rates and child mortality
Source: PubMed Central journal article supplement (PMC6936423; doi:10.1136/bmjgh-2019-001789), 2019-12-03
Supplement: bmjgh-2019-001789supp001.pdf [file bmjgh-2019-001789supp001.pdf]

## Online Supplementary Appendix

Table 1: Low and lower-middle income country groupings according to Gavi eligibility status

| Never eligible (control) |                   | Always eligible (treatment) |              | Early graduates<br>(not in main sample) | Late graduates<br>(not in main sample) |
|--------------------------|-------------------|-----------------------------|--------------|-----------------------------------------|----------------------------------------|
| Algeria                  | Micronesia,       | Afghanistan                 | Lesotho      | Albania                                 | Angola                                 |
| Belarus                  | Fed. Sts.         | Bangladesh                  | Liberia      | Bosnia &                                | Armenia                                |
| Belize                   | Morocco           | Benin                       | Madagascar   | Herzegovina                             | Azerbaijan                             |
| Cabo Verde               | Namibia           | Burkina Faso                | Malawi       | China                                   | Bhutan                                 |
| Colombia                 | Paraguay          | Burundi                     | Mali         | Turkmenistan                            | Bolivia                                |
| Dominican                | Peru              | Cambodia                    | Mauritania   |                                         | Congo, Rep.                            |
| Republic                 | Philippines       | Cameroon                    | Mozambique   |                                         | Cuba                                   |
| Ecuador                  | Russian           | Central African             | Myanmar      |                                         | Georgia                                |
| Egypt, Arab Rep.         | Federation        | Republic                    | Nepal        |                                         | Guyana                                 |
| El Salvador              | Samoa             | Chad                        | Niger        |                                         | Honduras                               |
| Equatorial Guinea        | St. Vincent & the | Comoros                     | Nigeria      |                                         | Indonesia                              |
| Fiji                     | Grenadines        | Congo, Dem. Rep.            | Pakistan     |                                         | Kiribati                               |
| Guatemala                | Suriname          | Cote d'Ivoire               | Rwanda       |                                         | Moldova                                |
| Iran, Islamic Rep.       | Swaziland         | Djibouti                    | Sao Tome &   |                                         | Mongolia                               |
| Iraq                     | Syrian Arab       | Eritrea                     | Principe     |                                         | Nicaragua                              |
| Jamaica                  | Republic          | Ethiopia                    | Senegal      |                                         | Papua New Guinea                       |
| Jordan                   | Thailand          | Gambia, The                 | Sierra Leone |                                         | Sri Lanka                              |
| Kazakhstan               | Tonga             | Ghana                       | Solomon      |                                         | Ukraine                                |
| Macedonia, FYR           | Tunisia           | Guinea                      | Islands      |                                         | Uzbekistan                             |
| Maldives                 | Vanuatu           | Guinea-Bissau               | Somalia      |                                         | Vietnam                                |
| Marshall Islands         | West Bank &       | Haiti                       | Sudan        |                                         |                                        |
|                          | Gaza              | India                       | Tajikistan   |                                         |                                        |
|                          |                   | Kenya                       | Tanzania     |                                         |                                        |
|                          |                   | Korea, Dem.                 | Togo         |                                         |                                        |
|                          |                   | People's Rep.               | Uganda       |                                         |                                        |
|                          |                   | Kyrgyz Republic             | Yemen, Rep.  |                                         |                                        |
|                          |                   | Lao PDR                     | Zambia       |                                         |                                        |
|                          |                   |                             | Zimbabwe     |                                         |                                        |

Table 2: Summary statistics

| Variable                                                      | Country-year observations (n) |        |        | Country-year observations (n)           |         |         |
|---------------------------------------------------------------|-------------------------------|--------|--------|-----------------------------------------|---------|---------|
|                                                               | Mean                          | SD     | Mean   | SD                                      | SD      |         |
|                                                               | Gavi eligible countries       |        |        | Control group of non-eligible countries |         |         |
| Immunization, DPT (% 12–23 months old)                        | 1,114                         | 71.56  | 19.92  | 792                                     | 87.10   | 13.96   |
| Immunization, measles (% 12–23 months old)                    | 1,114                         | 70.55  | 18.30  | 792                                     | 87.59   | 12.85   |
| Infant mortality rate (per 1,000 live births)                 | 1,122                         | 70.00  | 25.49  | 814                                     | 26.61   | 16.12   |
| Under-5 mortality rate (per 1,000 live births)                | 1,122                         | 107.42 | 47.31  | 814                                     | 33.49   | 24.13   |
| Population (million)                                          | 1,117                         | 45.92  | 161.07 | 814                                     | 19.82   | 31.44   |
| GDP per capita, constant PPP US\$                             | 1,059                         | 763.60 | 397.07 | 786                                     | 4332.98 | 2435.38 |
| Gavi disbursements, constant US\$ million                     | 1,122                         | 7.77   | 18.51  | 814                                     | 0       | 0       |
| Global Fund disbursements, constant US\$ million              | 1,122                         | 19.88  | 39.40  | 792                                     | 3.26    | 7.16    |
| Global DAH disbursements (net of Gavi), constant US\$ million | 1,122                         | 69.71  | 105.75 | 792                                     | 15.99   | 34.57   |
| HIV prevalence, total (% of population ages 15–49)            | 1,056                         | 3.49   | 4.96   | 572                                     | 2.25    | 5.76    |
| Tuberculosis (TB) incidence, per 100,000 people               | 867                           | 266.69 | 195.80 | 629                                     | 121.22  | 206.60  |
| Incidence of malaria (per 1,000 population at risk)           | 200                           | 218.53 | 184.48 | 76                                      | 35.23   | 76.00   |

Data source: WDI, OECD CRS, Gavi.

**Table 3: Gavi effect, controlling for other DAH**

|                                                  | (1)<br>Controlling for<br>Global Fund<br>disbursements | (2)<br>Controlling for all<br>non-Gavi DAH | (3)<br>Excluding Latin<br>American<br>(PAHO)<br>countries | (4)<br>Controlling for<br>Global Fund<br>disbursements | (5)<br>Controlling for all<br>non-Gavi DAH | (3)<br>Excluding Latin<br>American<br>(PAHO)<br>countries |
|--------------------------------------------------|--------------------------------------------------------|--------------------------------------------|-----------------------------------------------------------|--------------------------------------------------------|--------------------------------------------|-----------------------------------------------------------|
| Panel A: Dependent variable – Immunization rates |                                                        |                                            |                                                           |                                                        |                                            |                                                           |
|                                                  | DPT (% 12–23 months old)                               |                                            |                                                           | Measles (% 12–23 months old)                           |                                            |                                                           |
| Gavi eligibility effect                          | 11.29***<br>(2.60)                                     | 11.94***<br>(2.74)                         | 13.86***<br>(3.25)                                        | 7.93***<br>(2.42)                                      | 8.75***<br>(2.64)                          | 10.94***<br>(3.16)                                        |
| Observations                                     | 1,714                                                  | 1,714                                      | 1,484                                                     | 1,714                                                  | 1,714                                      | 1,484                                                     |
| Number of countries                              | 83                                                     | 83                                         | 72                                                        | 83                                                     | 83                                         | 72                                                        |
| Adjusted R-squared                               | 0.37                                                   | 0.37                                       | 0.37                                                      | 0.32                                                   | 0.31                                       | 0.33                                                      |
| Panel B: Dependent variable – Mortality rates    |                                                        |                                            |                                                           |                                                        |                                            |                                                           |
|                                                  | Infant mortality<br>(per 1,000 live births)            |                                            |                                                           | Under-5 mortality<br>(per 1,000 live births)           |                                            |                                                           |
| Gavi eligibility effect                          | -5.62**<br>(2.17)                                      | -6.20***<br>(2.13)                         | -5.92**<br>(2.33)                                         | -11.29***<br>(3.75)                                    | -12.23***<br>(3.70)                        | -10.26**<br>(4.05)                                        |
| Observations                                     | 1,080                                                  | 1,080                                      | 901                                                       | 1,080                                                  | 1,080                                      | 901                                                       |
| Number of countries                              | 81                                                     | 81                                         | 70                                                        | 81                                                     | 81                                         | 70                                                        |
| Adjusted R-squared                               | 0.80                                                   | 0.79                                       | 0.80                                                      | 0.80                                                   | 0.79                                       | 0.80                                                      |
| Country fixed-effects                            | Yes                                                    | Yes                                        | Yes                                                       | Yes                                                    | Yes                                        | Yes                                                       |
| Year fixed-effects                               | Yes                                                    | Yes                                        | Yes                                                       | Yes                                                    | Yes                                        | Yes                                                       |
| Covariates                                       | Yes                                                    | Yes                                        | Yes                                                       | Yes                                                    | Yes                                        | Yes                                                       |

Robust standard errors in parentheses clustered at the country level. \*\*\* p<0.01, \*\* p<0.05, \* p<0.1. Main data source: World Development Indicators. Sample period: 1995–2016. All regressions include PPP-adjusted GDP per capita (in log) and population (in log) unless otherwise stated. Panel B: Additional covariates are: primary school enrolment, secondary school enrolment, urban population, and political rights.

**Table 4: HIPC debt relief initiative**

|                                                                        | (1)<br>Immunization, DPT<br>(% 12-23 months old) | (2)<br>Immunization, measles<br>(% 12-23 months old) | (3)<br>Infant mortality rate<br>(per 1,000 live births) | (4)<br>Under-5 mortality rate<br>(per 1,000 live births) |
|------------------------------------------------------------------------|--------------------------------------------------|------------------------------------------------------|---------------------------------------------------------|----------------------------------------------------------|
| Panel A: Controlling for HIPC relief support - 1st variable definition |                                                  |                                                      |                                                         |                                                          |
| Gavi eligibility effect                                                | 12.19***<br>(2.90)                               | 9.13***<br>(2.77)                                    | -7.72***<br>(2.34)                                      | -15.24***<br>(4.13)                                      |
| Observations                                                           | 1,735                                            | 1,735                                                | 1,096                                                   | 1,096                                                    |
| Number of countries                                                    | 84                                               | 84                                                   | 82                                                      | 82                                                       |
| Adjusted R-squared                                                     | 0.36                                             | 0.30                                                 | 0.80                                                    | 0.79                                                     |
| Panel B: Controlling for HIPC relief support - 2nd variable definition |                                                  |                                                      |                                                         |                                                          |
| Gavi eligibility effect                                                | 10.33***<br>(2.83)                               | 7.51***<br>(2.64)                                    | -5.69**<br>(2.23)                                       | -10.34***<br>(3.69)                                      |
| Observations                                                           | 1,735                                            | 1,735                                                | 1,096                                                   | 1,096                                                    |
| Number of countries                                                    | 84                                               | 84                                                   | 82                                                      | 82                                                       |
| Adjusted R-squared                                                     | 0.37                                             | 0.31                                                 | 0.80                                                    | 0.79                                                     |
| Country fixed-effects                                                  | Yes                                              | Yes                                                  | Yes                                                     | Yes                                                      |
| Year fixed-effects                                                     | Yes                                              | Yes                                                  | Yes                                                     | Yes                                                      |
| Covariates                                                             | Yes                                              | Yes                                                  | Yes                                                     | Yes                                                      |

Robust standard errors in parentheses clustered at the country level. \*\*\* p<0.01, \*\* p<0.05, \* p<0.1. Full sample, unweighted regressions. First definition of HIPC relief support: Dummy variable equal to 1 time between HIPC decision point and completion, and 0 otherwise. Second definition of HIPC relief support: Dummy variable equal to 1 after HIPC decision point, and 0 otherwise. Main data source: World Development Indicators. Sample period: 1995–2016. All regressions include PPP-adjusted GDP per capita (in log) and population (in log) unless otherwise stated. Columns 3 and 4: Additional covariates are: primary school enrolment, secondary school enrolment, urban population, and political rights.

**Table 5: Falsification test: effect on diseases Gavi doesn't target**

|                                         | (1)                                      | (2)                                          | (3)                                  |
|-----------------------------------------|------------------------------------------|----------------------------------------------|--------------------------------------|
| Dependent variables:                    |                                          |                                              |                                      |
|                                         | HIV prevalence<br>(% of pop. ages 15-49) | Malaria incidence<br>(per 1,000 pop.at risk) | TB incidence<br>(per 100,000 people) |
| Gavi disbursements (real US\$ m)        | 0.001<br>(0.003)                         | 0.074<br>(0.220)                             | 0.278<br>(0.230)                     |
| Global Fund disbursements (real US\$ m) | -0.013***<br>(0.004)                     | -0.466<br>(0.285)                            | -0.407**<br>(0.190)                  |
| Observations                            | 1,592                                    | 266                                          | 1,402                                |
| Number of countries                     | 73                                       | 67                                           | 83                                   |
| Adjusted R-squared                      | 0.209                                    | 0.455                                        | 0.163                                |
| Country fixed-effects                   | Yes                                      | Yes                                          | Yes                                  |
| Year fixed-effects                      | Yes                                      | Yes                                          | Yes                                  |
| Covariates                              | Yes                                      | Yes                                          | Yes                                  |

Robust standard errors in parentheses clustered at the country level. \*\*\* p<0.01, \*\* p<0.05, \* p<0.1. Main data source: World Development Indicators. Sample period: 1995–2016. All regressions include PPP-adjusted GDP per capita (in log) and population (in log) unless otherwise stated.

**Table 6: DHS data results**

|                         | (1)                                                               | (2)                                                                | (3)                                                                   |
|-------------------------|-------------------------------------------------------------------|--------------------------------------------------------------------|-----------------------------------------------------------------------|
| Dependent variables:    | % of children 12-23 months<br>who had received no<br>vaccinations | % of children 12-23 months<br>who had received DPT3<br>vaccination | % of children 12-23 months who<br>had received Measles<br>vaccination |
| Gavi eligibility effect | -5.13***<br>(1.66)                                                | 8.23***<br>(2.88)                                                  | 11.16***<br>(3.00)                                                    |
| Observations            | 146                                                               | 146                                                                | 146                                                                   |
| Number of countries     | 54                                                                | 54                                                                 | 54                                                                    |
| Adjusted R-squared      | 0.39                                                              | 0.60                                                               | 0.59                                                                  |
| Country fixed-effects   | Yes                                                               | Yes                                                                | Yes                                                                   |
| Year fixed-effects      | Yes                                                               | Yes                                                                | Yes                                                                   |
| Covariates              | Yes                                                               | Yes                                                                | Yes                                                                   |

Robust standard errors in parentheses clustered at the country level. \*\*\* p<0.01, \*\* p<0.05, \* p<0.1. Full sample, unweighted regressions. Data sources: Demographic and Health Surveys (outcome variables) and World Development Indicators (control variables). Sample period: 1995–2016. All regressions include PPP-adjusted GDP per capita (in log) and population (in log) unless otherwise stated.

**Table 7: RDD-defined samples**

| Dependent variables:                                                                               | (1)<br>Immunization, DPT<br>(% 12-23 months old) | (2)<br>Immunization, measles<br>(% 12-23 months old) | (3)<br>Infant mortality rate<br>(per 1000 live births) | (4)<br>Under-5 mortality rate<br>(per 1000 live births) |
|----------------------------------------------------------------------------------------------------|--------------------------------------------------|------------------------------------------------------|--------------------------------------------------------|---------------------------------------------------------|
| Panel A. Narrow bandwidth sample: 0.5 log points of GNI on either side of Gavi eligibility cut-off |                                                  |                                                      |                                                        |                                                         |
| Gavi eligibility effect                                                                            | 5.16**<br>(2.27)                                 | 3.97*<br>(2.14)                                      | -2.66*<br>(1.34)                                       | -5.85**<br>(2.26)                                       |
| Observations                                                                                       | 1,276                                            | 1,276                                                | 774                                                    | 774                                                     |
| Number of countries                                                                                | 61                                               | 61                                                   | 59                                                     | 59                                                      |
| Adjusted R-squared                                                                                 | 0.21                                             | 0.19                                                 | 0.82                                                   | 0.79                                                    |
| Panel B. Medium bandwidth sample: 1 log point of GNI on either side of Gavi eligibility cut-off    |                                                  |                                                      |                                                        |                                                         |
| Gavi eligibility effect                                                                            | 5.24***<br>(1.84)                                | 4.59***<br>(1.67)                                    | -3.17***<br>(1.12)                                     | -6.85***<br>(1.95)                                      |
| Observations                                                                                       | 1,979                                            | 1,979                                                | 1,202                                                  | 1,202                                                   |
| Number of countries                                                                                | 95                                               | 95                                                   | 92                                                     | 92                                                      |
| Adjusted R-squared                                                                                 | 0.27                                             | 0.23                                                 | 0.80                                                   | 0.77                                                    |
| Country fixed-effects                                                                              | Yes                                              | Yes                                                  | Yes                                                    | Yes                                                     |
| Year fixed-effects                                                                                 | Yes                                              | Yes                                                  | Yes                                                    | Yes                                                     |
| Covariates                                                                                         | Yes                                              | Yes                                                  | Yes                                                    | Yes                                                     |

Robust standard errors in parentheses clustered at the country level. \*\*\* p<0.01, \*\* p<0.05, \* p<0.1. Unweighted regressions. Main data source: World Development Indicators (control variables). Sample period: 1995–2016. All regressions include PPP-adjusted GDP per capita (in log) and population (in log) unless otherwise stated. Columns 3 and 4: Additional covariates are: primary school enrolment, secondary school enrolment, urban population, and political rights.

**Table 8: Heterogeneous time effects**

| Dependent variables:                | (1)<br>Immunization – DPT<br>(% 12-23 months old) | (2)<br>Immunization – measles<br>(% 12-23 months old) |
|-------------------------------------|---------------------------------------------------|-------------------------------------------------------|
| Gavi eligibility effect – phase I   | 9.09***<br>(2.45)                                 | 5.74**<br>(2.38)                                      |
| Gavi eligibility effect – phase II  | 15.86***<br>(3.22)                                | 12.68***<br>(3.07)                                    |
| Gavi eligibility effect – phase III | 19.81***<br>(4.12)                                | 15.80***<br>(3.71)                                    |
| Observations                        | 333                                               | 333                                                   |
| Number of countries                 | 84                                                | 84                                                    |
| Adjusted R-squared                  | 0.52                                              | 0.46                                                  |
| Country fixed-effects               | Yes                                               | Yes                                                   |
| Year fixed-effects                  | Yes                                               | Yes                                                   |
| Covariates                          | Yes                                               | Yes                                                   |

Robust standard errors in parentheses clustered at the country level. \*\*\* p<0.01, \*\* p<0.05, \* p<0.1. Main data source: World Development Indicators. Sample period: 1995–2016. All regressions include PPP-adjusted GDP per capita (in log) and population (in log) unless otherwise stated.

**Table 9: Effect of Gavi disbursements by programme type**

| Dependent variables:                                    | (1)                                        | (2)              | (3)               | (4)                                            | (5)             | (6)              | (7)                                             | (8)               | (9)               | (10)                                             | (11)             | (12)             |
|---------------------------------------------------------|--------------------------------------------|------------------|-------------------|------------------------------------------------|-----------------|------------------|-------------------------------------------------|-------------------|-------------------|--------------------------------------------------|------------------|------------------|
|                                                         | Immunization - DPT<br>(% 12-23 months old) |                  |                   | Immunization - measles<br>(% 12-23 months old) |                 |                  | Infant mortality rate<br>(per 1000 live births) |                   |                   | Under-5 mortality rate<br>(per 1000 live births) |                  |                  |
| Gavi disbursements - System support (HSS, INS, and ISS) | 0.34***<br>(0.09)                          |                  |                   | 0.31***<br>(0.08)                              |                 |                  | -0.10*<br>(0.06)                                |                   |                   | -0.18<br>(0.11)                                  |                  |                  |
| Gavi disbursements - Vaccine support (NVS)              |                                            | 0.17**<br>(0.07) |                   |                                                | 0.13*<br>(0.08) |                  |                                                 | -0.10**<br>(0.05) |                   |                                                  | -0.18*<br>(0.10) |                  |
| Gavi disbursements - Total                              |                                            |                  | 0.15***<br>(0.05) |                                                |                 | 0.12**<br>(0.06) |                                                 |                   | -0.08**<br>(0.04) |                                                  |                  | -0.14*<br>(0.08) |
| Observations                                            | 1,735                                      | 1,735            | 1,735             | 1,735                                          | 1,735           | 1,735            | 1,823                                           | 1,823             | 1,823             | 1,823                                            | 1,823            | 1,823            |
| Number of countries                                     | 84                                         | 84               | 84                | 84                                             | 84              | 84               | 84                                              | 84                | 84                | 84                                               | 84               | 84               |
| Adjusted R-squared                                      | 0.32                                       | 0.33             | 0.34              | 0.28                                           | 0.28            | 0.29             | 0.77                                            | 0.77              | 0.77              | 0.74                                             | 0.74             | 0.74             |
| Country fixed-effects                                   | Yes                                        | Yes              | Yes               | Yes                                            | Yes             | Yes              | Yes                                             | Yes               | Yes               | Yes                                              | Yes              | Yes              |
| Year fixed-effects                                      | Yes                                        | Yes              | Yes               | Yes                                            | Yes             | Yes              | Yes                                             | Yes               | Yes               | Yes                                              | Yes              | Yes              |
| Covariates                                              | Yes                                        | Yes              | Yes               | Yes                                            | Yes             | Yes              | Yes                                             | Yes               | Yes               | Yes                                              | Yes              | Yes              |

Robust standard errors in parentheses clustered at the country level. \*\*\* p<0.01, \*\* p<0.05, \* p<0.1. Main data source: World Development Indicators and Gavi's own disbursement portfolio. Sample period: 1995–2016. All regressions include PPP-adjusted GDP per capita (in log), population (in log). Gavi disbursements expressed in real US\$ million. System support refers to the sum of Health system and immunisation strengthening (HSS), Injection safety support (INS), and (Immunisation services support). Vaccine support disbursements refer to New and underused vaccine support (NVS).

Figure 1: Late graduate countries – DPT immunization rates over time

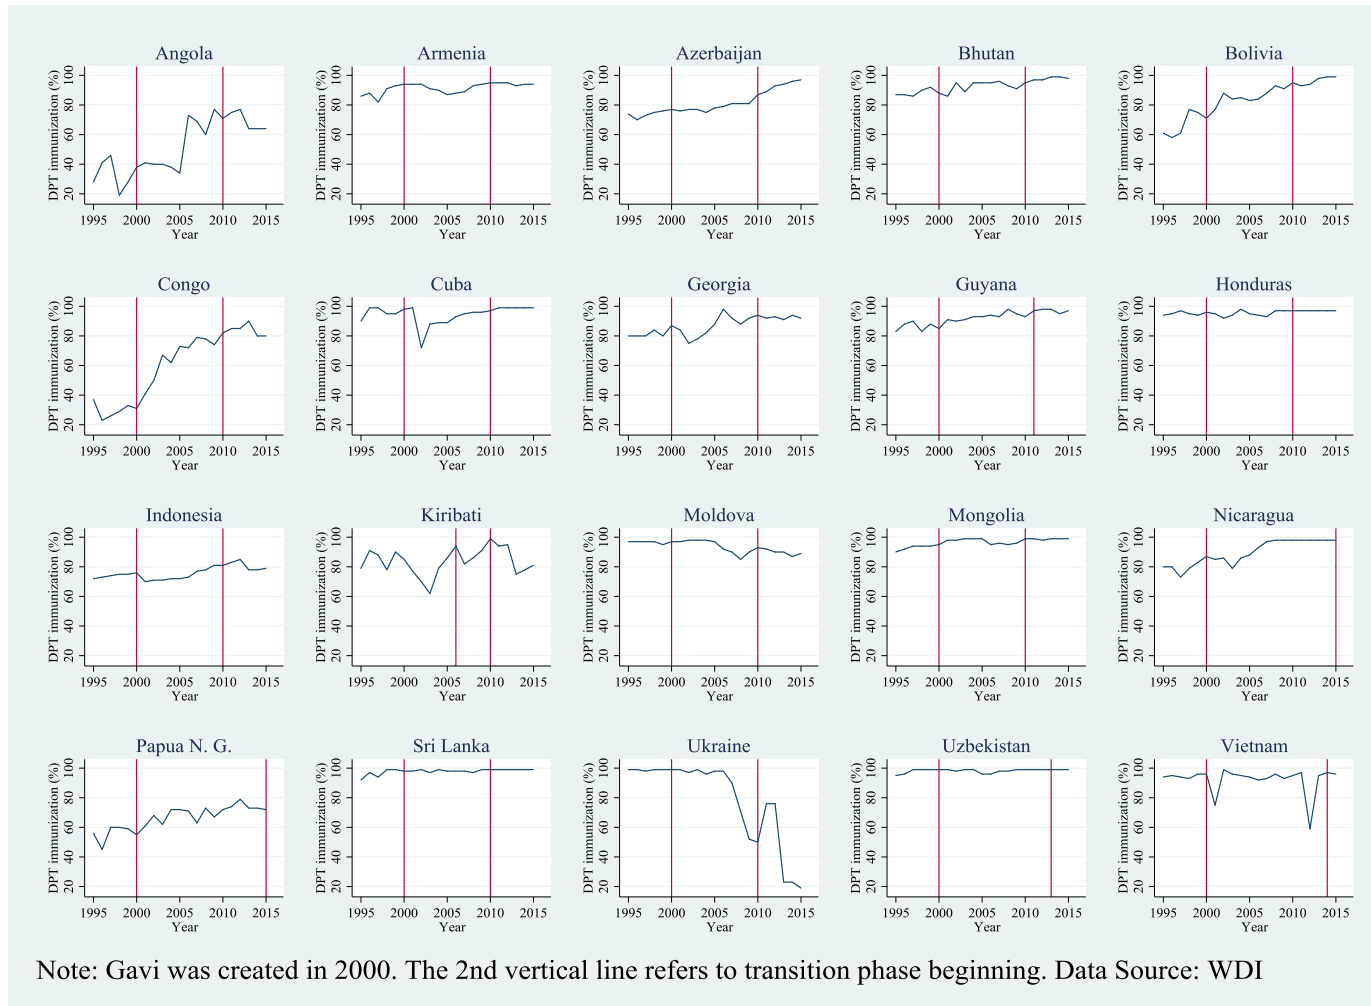

**Table 10: Gavi effect on immunization rates, alternative samples and time periods**

|                                                                                      | (1)<br>Excluding early<br>& late graduates,<br>to 2016 | (2)<br>Excluding early<br>graduates only, to<br>2016 | (3)<br>Excluding early<br>& late graduates,<br>to 2010 | (4)<br>Excluding early<br>graduates only, to<br>2010 |
|--------------------------------------------------------------------------------------|--------------------------------------------------------|------------------------------------------------------|--------------------------------------------------------|------------------------------------------------------|
| <b>Panel A: Dependent variable – Immunization rate, DPT (% 12–23 months old)</b>     |                                                        |                                                      |                                                        |                                                      |
| Gavi eligibility effect                                                              | 12.02***<br>(2.75)                                     | 9.18***<br>(2.61)                                    | 8.06***<br>(2.25)                                      | 6.99***<br>(1.96)                                    |
| Observations                                                                         | 1,735                                                  | 2,134                                                | 1,319                                                  | 1,623                                                |
| Number of countries                                                                  | 84                                                     | 103                                                  | 84                                                     | 103                                                  |
| Adjusted R-squared                                                                   | 0.36                                                   | 0.33                                                 | 0.36                                                   | 0.35                                                 |
| <b>Panel B: Dependent variable – Immunization rate, measles (% 12–23 months old)</b> |                                                        |                                                      |                                                        |                                                      |
| Gavi eligibility effect                                                              | 8.81***<br>(2.63)                                      | 8.09***<br>(2.38)                                    | 5.55**<br>(2.30)                                       | 6.00***<br>(2.01)                                    |
| Observations                                                                         | 1,735                                                  | 2,134                                                | 1,319                                                  | 1,623                                                |
| Number of countries                                                                  | 84                                                     | 103                                                  | 84                                                     | 103                                                  |
| Adjusted R-squared                                                                   | 0.30                                                   | 0.28                                                 | 0.28                                                   | 0.26                                                 |
| Country fixed-effects                                                                | Yes                                                    | Yes                                                  | Yes                                                    | Yes                                                  |
| Year fixed-effects                                                                   | Yes                                                    | Yes                                                  | Yes                                                    | Yes                                                  |
| Covariates                                                                           | Yes                                                    | Yes                                                  | Yes                                                    | Yes                                                  |

Robust standard errors in parentheses clustered at the country level. \*\*\* p<0.01, \*\* p<0.05, \* p<0.1. Main data source: World Development Indicators. Sample period: 1995–2016 (columns 1 and 2), 1995–2010 (columns 3 and 4). All regressions include PPP-adjusted GDP per capita (in log) and population (in log) unless otherwise stated.
